# Supplementary material for: The role of the support properties in the catalytic performance of an anchored copper(ii) aza-bis(oxazoline) in mesoporous silicas and their carbon replicas
Source: Royal Society of Chemistry journal article supplement (doi:10.1039/c2cy20638b), 2012-10-23
Supplement: c2cy20638b.pdf [file c2cy20638b.pdf]

## **Electronic Supplementary information**

### **The role of the support properties in the catalytic performance of an anchored copper(II) aza-bis(oxazoline) in mesoporous silicas and their carbon replicas**

Ana Rosa Silva<sup>1\*</sup>, Vanessa Guimarães<sup>1</sup>, Ana Paula Carvalho<sup>2</sup>, João Pires<sup>2</sup>

<sup>1</sup> Departamento de Química, CICECO, Universidade de Aveiro, Campus Universitário de Santiago, 3810-193 Aveiro, Portugal

<sup>2</sup> CQB, Departamento de Química e Bioquímica, Faculdade de Ciências, Universidade de Lisboa, 1749-016 Lisboa, Portugal

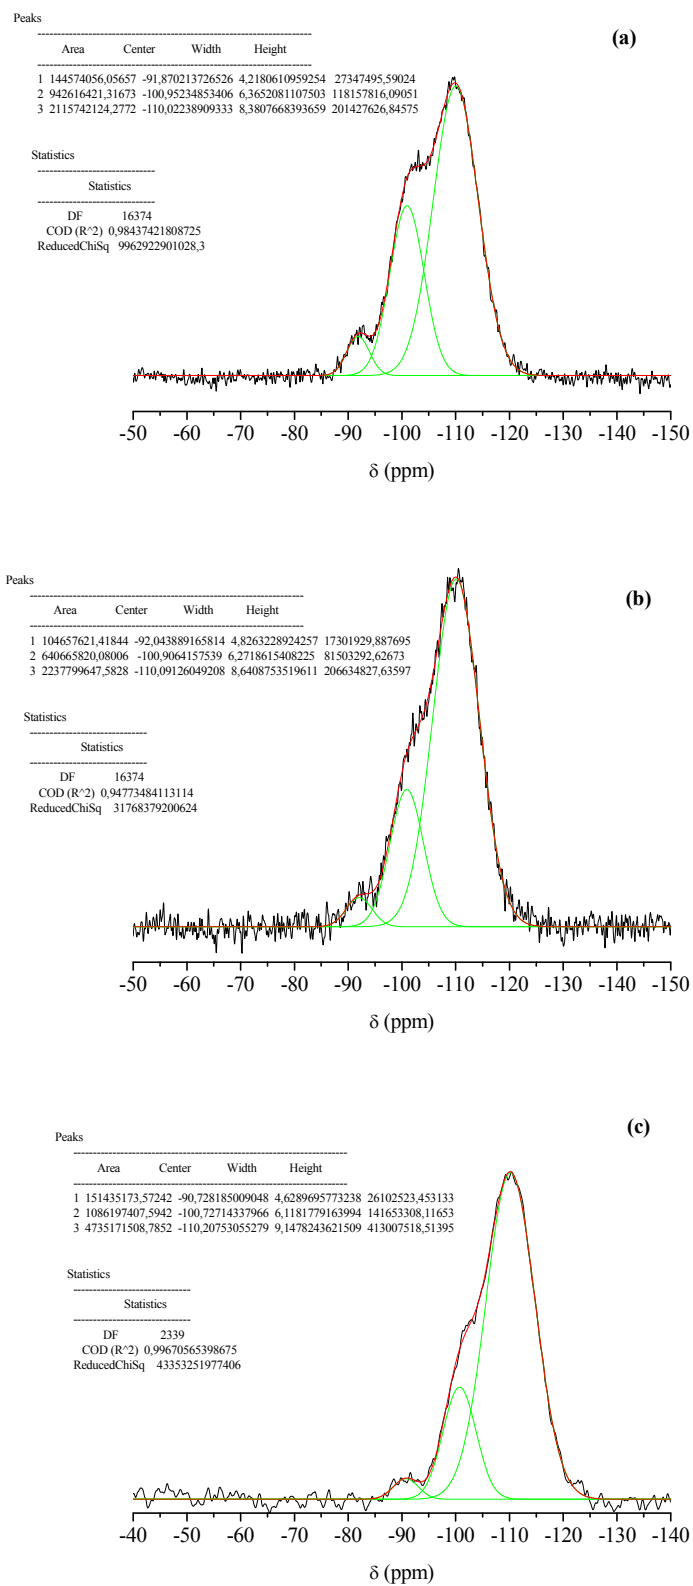

**Fig. S1** Deconvolution of the <sup>29</sup>Si MAS NMR spectra of the (a) HMS, (b) SBA-15 and (c) SPSi.

**Table S1** XPS elemental analysis of some of the 3Cu@MM materials.

| Sample     | Atom% |      |       |      |       |      |                      |     | $\mu\text{mol Cu/g}$ |  |
|------------|-------|------|-------|------|-------|------|----------------------|-----|----------------------|--|
|            | C 1s  | N 1s | O 1s  | F 1s | Si 2p | S 2p | Cu 2p <sub>3/2</sub> | XPS | ICP                  |  |
| 3Cu@SBA-15 | 5.72  | 0.71 | 59.57 | 1.26 | 31.79 |      | 0.83                 | 413 | 157                  |  |
| 3Cu@HMS    | 4.48  | 0.17 | 60.39 | 0.57 | 34.27 |      | 0.13                 | 65  | 138                  |  |
| 3Cu@SPC    | 91.43 | 0.26 | 5.63  | 1.35 | 0.52  | 0.47 | 0.17                 | 137 | 90                   |  |

**Table S2** Curve fitting of the high resolution XPS spectra in the areas C 1s, N 1s, O 1s, F 1s, Si 2p, S 2p and Cu 2p<sub>3/2</sub>.

| Sample     | Binding energy (FWHM)/ eV |             |             |             |             |             |                      |
|------------|---------------------------|-------------|-------------|-------------|-------------|-------------|----------------------|
|            | C 1s                      | N 1s        | O 1s        | F 1s        | Si 2p       | S 2p        | Cu 2p <sub>3/2</sub> |
| 3Cu@SBA-15 | 285.0 (2.5)               |             |             |             |             |             |                      |
|            | 287.7 (2.5)               | 400.1 (3.1) | 532.7 (2.3) | 688.4 (2.8) | 103.4 (2.3) |             | 932.8 (2.8)          |
|            | 292.3 (2.5)               |             |             |             |             |             |                      |
| 3Cu@HMS    | 285.0 (2.5)               | 400.8 (6.2) | 532.9 (2.4) | 688.4 (3.4) | 103.6 (2.4) |             | 933.6 (2.6)          |
|            | 287.2 (2.5)               |             |             |             |             |             |                      |
| 3Cu@SPC    | 284.4 (1.5)               |             |             |             |             |             |                      |
|            | 285.6 (2.5)               | 399.6 (2.5) | 533.7 (2.5) | 688.0 (2.6) | 102.0 (2.5) | 168.3 (2.5) | 934.2 (4.2)          |
|            | 288.9 (5.6)               |             | 536.8 (2.5) |             |             |             |                      |
